# Supplementary material for: Diallyl Disulfide Suppresses Inflammatory and Oxidative Machineries following Carrageenan Injection-Induced Paw Edema in Mice
Source: Hindawi journal article supplement (doi:10.1155/2020/8508906), 2020-04-15
Supplement: f1 [file 8508906.f1.pdf]

## Supplementary data

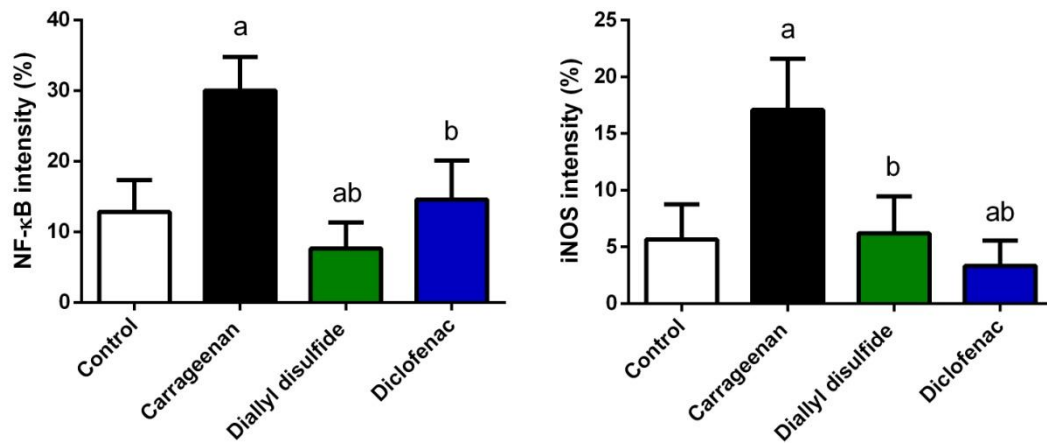

**Fig. S1:** Effect of diallyl disulfide (DADS, 100 mg/kg) or diclofenac (20 mg/kg) on paw skin NF-κB and iNOS expression intensity detected by immunohistochemistry following carrageenan injection-induced paw edema in mice.
